# Supplementary material for: High-energy-density materials with remarkable thermostability and insensitivity: syntheses, structures and physicochemical properties of Pb(ii) compounds with 3-(tetrazol-5-yl) triazole
Source: Royal Society of Chemistry journal article supplement (doi:10.1039/c4ta01746c), 2014-06-03
Supplement: c4ta01746c1.pdf [file c4ta01746c1.pdf]

## Supporting Information

### High-energy-density materials with remarkable thermostability and insensitivity: synthesis, structures and physicochemical properties of Pb(II) compounds based on 3-(tetrazol-5-yl)triazole as ligand

Wenjuan Gao,<sup>a,#</sup> Xiangyu Liu,<sup>a,b,#</sup> Zhiyong Su,<sup>a</sup> Qi Yang,<sup>a</sup> Qing Wei,<sup>a</sup> Sheng Zhang, Sanping Chen,<sup>\*a</sup> Gang Xie,<sup>a</sup> Xuwu Yang,<sup>a</sup> Shengli Gao<sup>a</sup>

[a] Key Laboratory of Synthetic and Natural Functional Molecule Chemistry of Ministry of Education, College of Chemistry and Materials Science, Northwest University, Xi'an 710069, China

[b] School of Chemistry and Chemical Engineering, Ningxia University, Yinchuan 750021, China

# These authors have equal contribution to this work.

#### Corresponding author

**Dr. Sanping Chen**

E-mail: [sanpingchen@126.com](mailto:sanpingchen@126.com); [sanpingchen312@gmail.com](mailto:sanpingchen312@gmail.com)

Tel.: +86-29-88302604

Fax: +86-29-88302604

#### Table of Contents

**Table S1.** Selected bond lengths (Å) and bond angles (°) for **1**.

**Table S2.** Selected bond lengths (Å) and bond angles (°) for **2**.

**Table S3.** Hydrogen-bonding interactions in **1** and **2**.

**Fig. S1** XRPD curves for compound **1**.

**Fig. S2** XRPD curves for compound **2**.

**Table S1.** Selected bond lengths (Å) and bond angles (°) for **1**.

|                      |            |                     |          |
|----------------------|------------|---------------------|----------|
| Pb(1)-N(14)          | 2.707(7)   | Pb(1)-N(1)          | 2.724(6) |
| Pb(1)-N(5)#1         | 2.721(7)   | Pb(1)-N(11)#2       | 2.738(6) |
| Pb(1)-O(1)           | 2.722(6)   | Pb(1)-N(8)          | 2.800(7) |
| Pb(1)-N(4)#1         | 2.821(6)   | N(4)#1-Pb(1)-N(14)  | 131.992  |
| N(14)-Pb(1)-N(5)#1   | 88.6(2)    | C(1)-N(1)-Pb(1)     | 119.7(5) |
| N(14)-Pb(1)-O(1)     | 69.50(19)  | N(2)-N(1)-Pb(1)     | 136.0(5) |
| N(5)#1-Pb(1)-O(1)    | 72.49(18)  | C(6)-N(13)-H(13)    | 127(6)   |
| N(14)-Pb(1)-N(1)     | 142.6(2)   | C(3)-N(5)-Pb(1)#3   | 139.8(5) |
| N(5)#1-Pb(1)-N(1)    | 88.0(2)    | C(2)-N(5)-Pb(1)#3   | 117.1(5) |
| O(1)-Pb(1)-N(1)      | 73.93(18)  | C(6)-N(14)-Pb(1)    | 139.6(6) |
| N(14)-Pb(1)-N(11)#2  | 80.1(2)    | C(5)-N(14)-Pb(1)    | 117.4(5) |
| N(5)#1-Pb(1)-N(11)#2 | 140.8(2)   | C(4)-N(8)-Pb(1)     | 114.9(5) |
| O(1)-Pb(1)-N(11)#2   | 68.34(17)  | N(9)-N(8)-Pb(1)     | 141.1(5) |
| N(1)-Pb(1)-N(11)#2   | 79.3(2)    | C(4)-N(11)-Pb(1)#4  | 116.2(5) |
| N(5)#1-Pb(1)-N(8)    | 79.5(2)    | N(10)-N(11)-Pb(1)#4 | 138.8(5) |
| O(1)-Pb(1)-N(8)      | 124.68(18) | Pb(1)-O(1)-H(1A)    | 125.4    |
| N(1)-Pb(1)-N(8)      | 151.7(2)   | Pb(1)-O(1)-H(1B)    | 109.3    |
| N(11)#2-Pb(1)-N(8)   | 125.6(2)   | N(4)#1-Pb(1)-N(5)#1 | 62.990   |
| N(4)#1-Pb(1)-N(11)#2 | 145.962    | N(4)#1-Pb(1)-N(8)   | 73.776   |
| N(4)#1-Pb(1)-N(1)    | 77.973     |                     |          |

Symmetry transformations used to generate equivalent atoms:

#1  $-y+1/4, x+1/4, -z+1/4$ ; #2  $-y+5/4, x+1/4, -z+1/4$ ;

#3  $y-1/4, -x+1/4, -z+1/4$ ; #4  $y-1/4, -x+5/4, -z+1/4$ .

**Table S2.** Selected bond lengths (Å) and bond angles (°) for **2**.

|                     |           |                      |           |
|---------------------|-----------|----------------------|-----------|
| Pb(1)-O(1)          | 2.363(17) | Pb(1)-N(1)           | 2.72(2)   |
| Pb(1)-O(1)#1        | 2.466(17) | O(1)-Pb(1)#3         | 2.466(17) |
| Pb(1)-O(1)#2        | 2.502(13) | O(1)-Pb(1)#2         | 2.502(13) |
| O(1)-Pb(1)-O(1)#1   | 107.8(6)  | C(2)-N(1)-Pb(1)      | 119.4(16) |
| O(1)-Pb(1)-O(1)#2   | 72.6(6)   | C(1)-N(1)-Pb(1)      | 137.3(18) |
| O(1)#1-Pb(1)-O(1)#2 | 72.6(6)   | Pb(1)-O(1)-Pb(1)#3   | 107.8(6)  |
| O(1)-Pb(1)-N(1)     | 77.9(6)   | Pb(1)-O(1)-Pb(1)#2   | 107.4(6)  |
| O(1)#1-Pb(1)-N(1)   | 83.3(6)   | Pb(1)#3-O(1)-Pb(1)#2 | 107.4(6)  |
| O(1)#2-Pb(1)-N(1)   | 133.4(6)  |                      |           |

Symmetry transformations used to generate equivalent atoms:

#1  $x+1, y, z$ ; #2  $-x+1, -y+1, -z+2$ ; #3  $x-1, y, z$ .

**Table S3.** Hydrogen-bonding interactions in **1** and **2**.

|                                                                                                         | $d(\text{D}-\text{H}\cdots\text{A})$ [Å] | $d(\text{D}-\text{H})$ [Å] | $d(\text{H}\cdots\text{A})$ [Å] | $d(\text{D}\cdots\text{A})$ [Å] | $\angle(\text{DHA})$ [°] |
|---------------------------------------------------------------------------------------------------------|------------------------------------------|----------------------------|---------------------------------|---------------------------------|--------------------------|
| <b>1</b>                                                                                                | O(1)-H(1A)...N(6)                        | 0.850                      | 2.557                           | 3.144                           | 127.15                   |
|                                                                                                         | O(1)-H(1B)...N(3)                        | 0.850                      | 2.355                           | 3.000                           | 133.01                   |
|                                                                                                         | O(1)-H(1B)...N(14)                       | 0.850                      | 2.697                           | 3.095                           | 110.23                   |
|                                                                                                         | N(6)-H(6)...N(2)                         | 0.888                      | 2.122                           | 2.896                           | 145.23                   |
| Symmetry transformations used to generate equivalent atoms:                                             |                                          |                            |                                 |                                 |                          |
| #1 $y-1/4, -x+3/4, z-1/4$ ; #2 $x, y+1/2, -z$ ; #3 $-y+3/4, x+1/4, z+1/4$ ; #4 $-y+5/4, x+3/4, z-1/4$ . |                                          |                            |                                 |                                 |                          |
| <b>2</b>                                                                                                | N(2)-H(2A)...N(7)                        | 0.860                      | 2.002                           | 2.851                           | 169.18                   |
|                                                                                                         | N(6)-H(6A)...O(1)                        | 0.860                      | 2.333                           | 2.964                           | 130.42                   |
| Symmetry transformations used to generate equivalent atoms:                                             |                                          |                            |                                 |                                 |                          |
| #1 $x+1, -y+1/2, z+1/2$ ; #2 $x-1, y, z-1$ .                                                            |                                          |                            |                                 |                                 |                          |

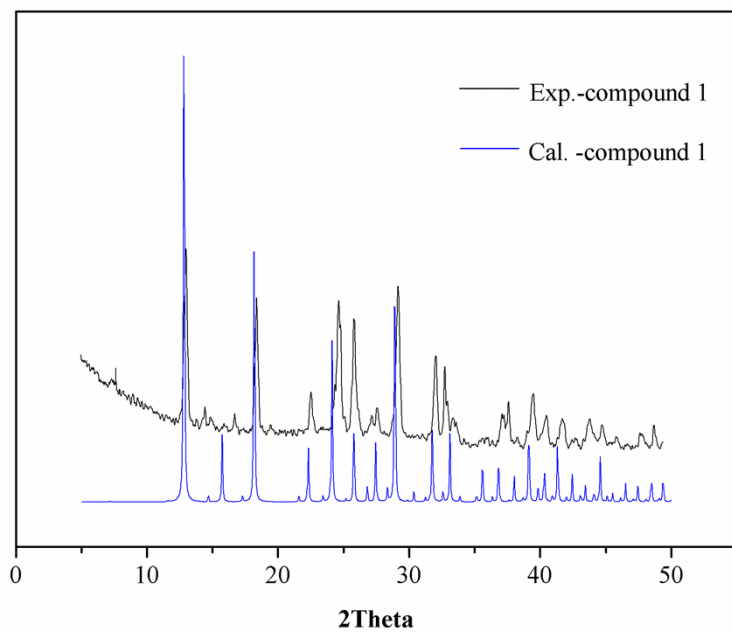

**Fig. S1** XRPD curves for compound 1.

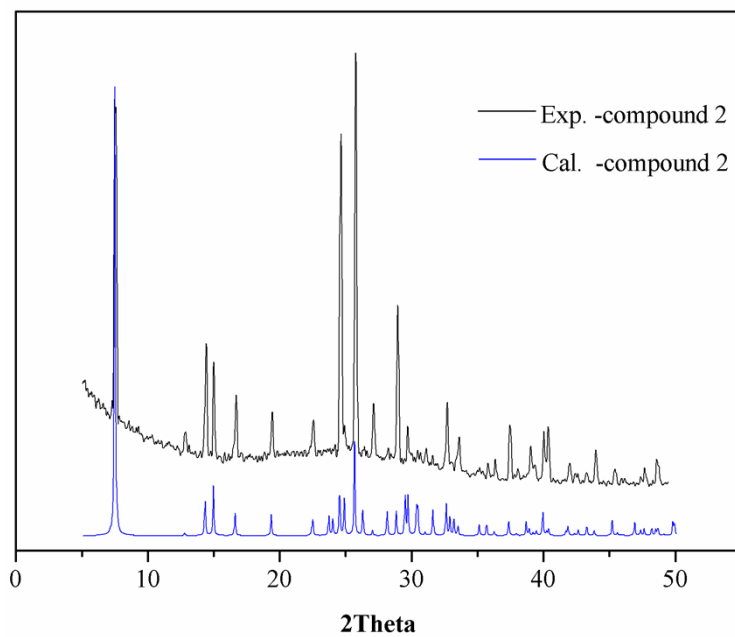

**Fig. S2** XRPD curves for compound 2.
